# Supplementary material for: Transcriptome Analysis of Female and Male Xiphophorus maculatus Jp 163 A
Source: PubMed Central journal article supplement (PMC3071723; doi:10.1371/journal.pone.0018379), 2011-04-05
Supplement: pone.0018379.s004.pdf [file pone.0018379.s004.pdf]

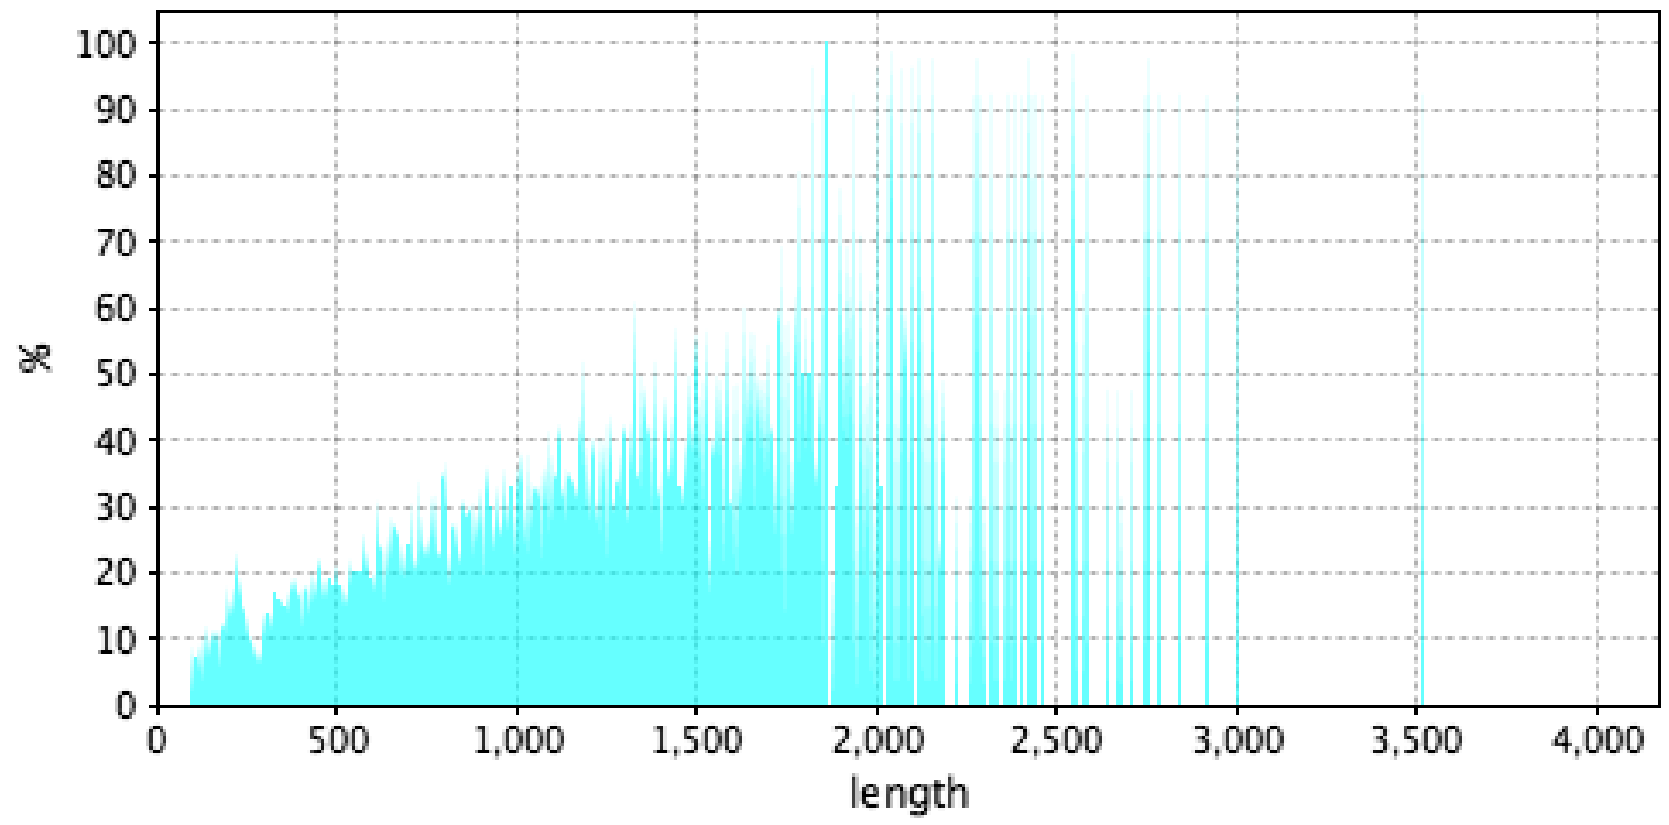

Figure S4
